# Supplementary material for: Nano3P-seq: transcriptome-wide analysis of gene expression and tail dynamics using end-capture nanopore cDNA sequencing
Source: Springer Nature journal article supplement (doi:10.1038/s41592-022-01714-w), 2022-12-19
Supplement: MOESM1 [file 41592_2022_1714_MOESM1_ESM.pdf]

# **Nano3P-seq: transcriptome-wide analysis of gene expression and tail dynamics using end-capture nanopore cDNA sequencing**

---

In the format provided by the  
authors and unedited

## SUPPLEMENTARY INFORMATION

### **Nano3P-seq: transcriptome-wide analysis of gene expression and tail dynamics using end-capture nanopore cDNA sequencing**

Oguzhan Begik<sup>1,2,3</sup>, Gregor Diensthuber<sup>1</sup>, Huanle Liu<sup>1</sup>, Anna Delgado-Tejedor<sup>1,4</sup>, Cassandra Kontur<sup>5</sup>, Adnan Muhammad Niazi<sup>6</sup>, Eivind Valen<sup>6,7</sup>, Antonio J. Giraldez<sup>5</sup>, Jean-Denis Beaudoin<sup>8</sup>, John S. Mattick<sup>2,9</sup>  
and Eva Maria Novoa<sup>1,4\*</sup>

<sup>1</sup> Centre for Genomic Regulation (CRG), The Barcelona Institute of Science and Technology, Dr. Aiguader 88, Barcelona 08003, Spain

<sup>2</sup> Garvan Institute of Medical Research, 384 Victoria St., Darlinghurst, 2010, NSW, Australia

<sup>3</sup> Faculty of Medicine, University of New South Wales, Sydney NSW 2052, Australia

<sup>4</sup> Universitat Pompeu Fabra, Dr. Aiguader 88, Barcelona 08003, Spain

<sup>5</sup> Department of Genetics, Yale University, USA

<sup>6</sup> Computational Biology Unit, Department of Informatics, University of Bergen, 5008 Bergen, Norway

<sup>7</sup> Sars International Centre for Marine Molecular Biology, University of Bergen, 5008 Bergen, Norway

<sup>8</sup> Department of Genetics and Genome Sciences, Institute for Systems Genomics, University of Connecticut Health Center, Farmington, CT, USA

<sup>9</sup> School of Biotechnology and Biomolecular Sciences, University of New South Wales, Sydney NSW 2052, Australia

\* Correspondence to: Eva Maria Novoa (eva.novoa@crg.eu)

## SUPPLEMENTARY PROTOCOL

### Library Preparation protocol for Nano3P-Seq

#### 1. Without Barcoding

##### Materials and consumables required:

- Direct cDNA Sequencing Kit (ONT, SQK-DCS109)
- Flow Cell Priming Kit (ONT, EXP-FLP001)
- AMPure XP Reagent (Agencourt , A63881)
- Blunt/TA Ligase Master Mix (NEB, M0367)
- TGIRT™-III Enzyme (InGex)
- RNase Inhibitor, Murine (NEB, M0314L)
- RNase Cocktail Enzyme Mix (ThermoFisher, AM2286)
- Qubit dsDNA HS Assay Kit (ThermoFisher, Q32854)
- 10 mM dNTP solution (ThermoFisher, R0191)
- 0.1 M DTT solution (ThermoFisher , 707265ML)
- 1.5 mL Eppendorf DNA LoBind Tubes (Eppendorf, 0030108051)
- 0.2 ml thin-walled PCR tubes (Starlab, A1402-3700)
- 1 M Nuclease-free Tris-Cl pH 7.5 (ThermoFisher, 15567027)
- 5 M Nuclease-free NaCl (ThermoFisher, AM9760G)
- 1 M Nuclease-free MgCl<sub>2</sub> (ThermoFisher, AM9530G)
- Nuclease-free water (ThermoFisher, AM9922)
- Freshly prepared 70% ethanol in nuclease-free water

##### Oligos required :

| Oligo Name                           | Sequence                                                                  |
|--------------------------------------|---------------------------------------------------------------------------|
| D_DNA<br>(Standard<br>desalting)     | /5Phos/CTTCCGATCACTTGCCTGTCGCTCTATCTTCN                                   |
| R_RNA<br>(RNase-Free<br>HPLC)        | rGrArArGrArUrArGrArGrCrGrArCrArGrGrCrArArGrUrGrArUrCrGrGrArArG/3S<br>pC3/ |
| CompA_DNA<br>(Standard<br>desalting) | GAAGATAGAGCGACAGGCAAGTGATCGGAAGA                                          |

### Preannealing of the oligos

We need pre-anneal R\_RNA and D\_DNA oligos in order to be able to initiate template switching.

| Reagent                 | Initial Concentration | Volume | Final Conc |
|-------------------------|-----------------------|--------|------------|
| R_RNA                   | 10 uM                 | 1 uL   | 1 uM       |
| D_DNA                   | 10 uM                 | 1 uL   | 1 uM       |
| Tris-Cl pH 7.5          | 0.1 M                 | 1 uL   | 0.01 M     |
| NaCl                    | 0.5 M                 | 1 uL   | 0.05 M     |
| RNase Inhibitor, Murine |                       | 0.5 uL |            |
| dH2O                    |                       | 5 uL   |            |
| Total                   |                       | 10 uL  |            |

- Heat the mixture for 94°C for 1 mins and ramp down to 25°C at 0.1°C/s (in thermal cycler).

### Reverse Transcription

| Component               | Initial Conc                                                   | Volume      | Final Conc/Amount                                            |
|-------------------------|----------------------------------------------------------------|-------------|--------------------------------------------------------------|
| 5X Reaction Buffer      | 2.25 M NaCl, 25 mM MgCl <sub>2</sub> , 100 mM Tris-HCl, pH 7.5 | 4 uL        | 450 mM NaCl, 5 mM MgCl <sub>2</sub> , 20 mM Tris-HCl, pH 7.5 |
| DTT                     | 0.1 M                                                          | 1 uL        | 5 mM                                                         |
| Pre-annealed oligos     | 1 uM                                                           | 2 uL        | 0.1 uM                                                       |
| RNA                     |                                                                | Up to 10 uL | 50-100 ng                                                    |
| TGIRT                   | 10uM- 200 Unit/ul                                              | 1-2 uL      | 500 nM- 1000 nM                                              |
| RNase Inhibitor, Murine |                                                                | 1 uL        |                                                              |
| Total                   |                                                                | 19 uL       |                                                              |

- *Pre-incubate at room temperature for 30 minutes, then add **1 ul of 10 mM dNTPs***
- Incubate at 60°C for 1 hour
- Inactivate the enzyme by incubating at 75°C for 15 mins
- Move reaction to ice

### RNase treatment

- Add 1.5 ul RNase Cocktail Enzyme Mix to each tube
- 37°C 10 minutes incubation
- Move reaction to ice

### Cleanup using Ampure XP Beads

- Mix the samples with the appropriate volume of beads (17  $\mu$ L, 0.8 X keeps everything above 150 nt, good for getting rid of adapters)
- Mix the beads by flicking
- Incubate 10 minutes at room temperature
- Spin down the tube and place it on the magnet
- Remove the supernatant
- Add 70% freshly prepared 200  $\mu$ L ethanol to the tube
- Incubate for 30 seconds at room temperature
- Remove the ethanol completely by spinning down the tube, placing back it on magnet and removing the liquid
- Air-dry the pellet for maximum 1 minute, do not let it dry out completely!
- Resuspend the beads in 16  $\mu$ L water
- Incubate 5-10 minutes in RT
- Place the beads on magnet
- Transfer the supernatant into a new tube.
- Quantify 1  $\mu$ L of eluted sample using a Qubit fluorometer
- Move to the next step

### Annealing of Complementary DNA to VNP Oligo

This step is essential to have a double-stranded DNA oligo with an A overhang, which will initiate the ligation to the adapter

| Components     | Initial Concentration | Final Conc.  | Volume       |
|----------------|-----------------------|--------------|--------------|
| cDNA           |                       |              | 15 $\mu$ L   |
| Tris-Cl pH 7.5 | 0.1 M                 | 0.01 M       | 2.25 $\mu$ L |
| NaCl           | 0.5 M                 | 0.05 M       | 2.25 $\mu$ L |
| CompA_DNA      | 10 $\mu$ M            | 0.44 $\mu$ M | 1 $\mu$ L    |
| Water          |                       |              | 2 $\mu$ L    |
| Total          |                       |              | 22.5 $\mu$ L |

- Mix by flicking
- Heat the mixture for 90°C for 1 mins and ramp down to RT at 0.1°C/s (in thermal cycler).
- Mix the following

### AMX Adapter Ligation

22.5  $\mu$ L cDNA-complement mix

2.5  $\mu$ L Adapter Mix (AMX adapter from the SQK-DCS109 kit)

25  $\mu$ L Blunt/TA Ligase Mix

- Mix by flicking
- Spin down
- Incubate at RT for 10 minutes

### **Ampure XP Beads Cleanup**

- Add 25 ul resuspended AMPure XP beads (0.5X) to the reaction and mix by flicking
- Incubate 10 minutes at room temperature
- Thaw Wash Buffer (WSB) and Elution Buffer (EB) at RT, mix by vortexing, spin down and place on ice. Check if the contents of each tube are clear of any precipitate.
- Spin down the tube and place it on the magnet
- Remove the supernatant
- Add 200 ul WSB to the beads. Close the tube lid, and resuspend the beads by flicking. Return the tube to the magnetic rack, allow beads to pellet and pipette off the supernatant
- Repeat the previous step.
- Remove the WSB completely by spinning down the tube, pipetting out the liquid and placing back it on magnet
- Air-dry the pellet for maximum 1 minute, do not let it dry out completely!
- Resuspend the beads in 13 ul Elution Buffer (EB)
- Incubate 5-10 minutes in RT
- Place the beads on magnet
- Place the elute in a 1.5 ml tube
- Quantify 1 µl of eluted sample using a Qubit fluorometer
- The prepared library is used for loading into the MinION flow cell. Store the library on ice until ready to load.
- Move to the “Prepare the library for loading” step.

## 2. With Barcoding

### Materials and consumables required:

- Direct cDNA Sequencing Kit (ONT, SQK-DCS109)
- Native Barcoding Expansion 1-12 (EXP-NBD104)
- Flow Cell Priming Kit (ONT, EXP-FLP001)
- NEBNext Quick Ligation Module (E6056)
- AMPure XP Reagent (Agencourt , A63881)
- Blunt/TA Ligase Master Mix (NEB, M0367)
- TGIRT™-III Enzyme (InGex)
- RNase Inhibitor, Murine (NEB, M0314L)
- RNase Cocktail Enzyme Mix (ThermoFisher, AM2286)
- Qubit dsDNA HS Assay Kit (ThermoFisher, Q32854)
- 10 mM dNTP solution (ThermoFisher, R0191)
- 0.1 M DTT solution (ThermoFisher , 707265ML)
- 1.5 mL Eppendorf DNA LoBind Tubes (Eppendorf, 0030108051)
- 0.2 ml thin-walled PCR tubes (Starlab, A1402-3700)
- 1 M Nuclease-free Tris-Cl pH 7.5 (ThermoFisher, 15567027)
- 5 M Nuclease-free NaCl (ThermoFisher, AM9760G)
- 1 M Nuclease-free MgCl<sub>2</sub> (ThermoFisher, AM9530G)
- Nuclease-free water (ThermoFisher, AM9922)
- Freshly prepared 70% ethanol in nuclease-free water

### Oligos required :

| Oligo Name                           | Sequence                                                                  |
|--------------------------------------|---------------------------------------------------------------------------|
| D_DNA<br>(Standard<br>desalting)     | /5Phos/CTTCCGATCACTTGCCTGTCGCTCTATCTTCN                                   |
| R_RNA<br>(RNase Free HPLC)           | rGrArArGrArUrArGrArGrCrGrArCrArGrGrCrArArGrUrGrArUrCrGrGrArArG/3Sp<br>C3/ |
| CompA_DNA<br>(Standard<br>desalting) | GAAGATAGAGCGACAGGCAAGTGATCGGAAGA                                          |

### Preannealing of the oligos

We need pre-anneal R\_RNA and D\_DNA oligos in order to be able to initiate template switching.

| Reagent                 | Initial Concentration | Volume | Final Conc |
|-------------------------|-----------------------|--------|------------|
| R_RNA                   | 10 uM                 | 1 uL   | 1 uM       |
| D_DNA                   | 10 uM                 | 1 uL   | 1 uM       |
| Tris-Cl pH 7.5          | 0.1 M                 | 1 uL   | 0.01 M     |
| NaCl                    | 0.5 M                 | 1 uL   | 0.05 M     |
| RNase Inhibitor, Murine |                       | 0.5 uL |            |
| dH2O                    |                       | 5 uL   |            |
| Total                   |                       | 10 uL  |            |

- Heat the mixture for 94°C for 1 mins and ramp down to 25°C at 0.1°C/s (in thermal cycler).

Important note: Prepare one reaction for each sample/barcode

### Reverse Transcription

| Component               | Initial Conc                                                   | Volume      | Final Conc/Amount                                            |
|-------------------------|----------------------------------------------------------------|-------------|--------------------------------------------------------------|
| 5X Reaction Buffer      | 2.25 M NaCl, 25 mM MgCl <sub>2</sub> , 100 mM Tris-HCl, pH 7.5 | 4 uL        | 450 mM NaCl, 5 mM MgCl <sub>2</sub> , 20 mM Tris-HCl, pH 7.5 |
| DTT                     | 0.1 M                                                          | 1 uL        | 5 mM                                                         |
| Pre-annealed oligos     | 1 uM                                                           | 2 uL        | 0.1 uM                                                       |
| RNA                     |                                                                | Up to 10 uL | 50-100 ng                                                    |
| TGIRT                   | 10uM- 200 Unit/ul                                              | 1-2 uL      | 500 nM- 1000 nM                                              |
| RNase Inhibitor, Murine |                                                                | 1 uL        |                                                              |
| Total                   |                                                                | 19 uL       |                                                              |

- *Pre-incubate at room temperature for 30 minutes, then add **1 ul of 10 mM dNTPs***
- Incubate at 60°C for 1 hour
- Inactivate the enzyme by incubating at 75°C for 15 mins
- Move reaction to ice

### RNase treatment

- Add 1.5 ul RNase Cocktail Enzyme Mix to each tube



- 37°C 10 minutes incubation
- Move reaction to ice

### Cleanup using Ampure XP Beads

- Mix the samples with 17 ul of beads (0.8X, depends on the size of your library, please refer to size selection by Ampure XP beads)
- Mix the beads by flicking
- Incubate 10 minutes at room temperature
- Spin down the tube and place it on the magnet
- Remove the supernatant
- Add 70% freshly prepared 200 ul ethanol to the tube
- Incubate for 30 seconds at room temperature
- Remove the ethanol
- Repeat the washing
- Remove the ethanol completely by spinning down the tube, placing back it on magnet and removing the liquid
- Air-dry the pellet for maximum 1 minute, do not let it dry out completely!
- Resuspend the beads in 16 ul water
- Incubate 5-10 minutes in RT
- Place the beads on magnet
- Transfer the supernatant into a new tube.
- Quantify 1 µl of eluted sample using a Qubit fluorometer

### Annealing of Complementary DNA to VNP Oligo

This step is essential to have a double-stranded DNA oligo with an A overhang, which will initiate the ligation to the adapter

| Components     | Initial Concentration | Final Conc. | Volume  |
|----------------|-----------------------|-------------|---------|
| cDNA           |                       |             | 15 uL   |
| Tris-Cl pH 7.5 | 0.1 M                 | 0.01 M      | 2.25 uL |
| NaCl           | 0.5 M                 | 0.05 M      | 2.25 uL |
| CompA_DNA      | 10 uM                 | 0.44 uM     | 1 uL    |
| Water          |                       |             | 2 uL    |
| Total          |                       |             | 22.5 uL |

- Mix by flicking
- Heat the mixture for 90°C for 1 mins and ramp down to RT at 0.1°C/s (in thermal cycler).
- Mix the following

### Barcode Ligation

22.5 uL cDNA-complement mix

2.5 uL Native Barcode (from the EXP-NBD104 kit)

## 25 uL Blunt/TA Ligase Mix

- Mix by flicking
- Spin down
- Incubate at RT for 10 minutes

## Cleanup using Ampure XP Beads

- Mix the samples with 25 ul of beads (0.5X, depends on the size of your library, please refer to size selection by Ampure XP beads)
- Mix the beads by flicking
- Incubate 10 minutes at room temperature
- Spin down the tube and place it on the magnet
- Remove the supernatant
- Add 70% freshly prepared 200 ul ethanol to the tube
- Incubate for 30 seconds at room temperature
- Remove the ethanol
- Repeat the washing
- Remove the ethanol completely by spinning down the tube, placing back it on magnet and removing the liquid
- Air-dry the pellet for maximum 1 minute, do not let it dry out completely!
- Resuspend the beads in 16 ul water (Normally its 26 ul but then in the pooling step it makes to much volume)
- Incubate 5-10 minutes in RT
- Place the beads on magnet
- Transfer the supernatant into a new tube.
- Quantify 1 µl of eluted sample using a Qubit fluorometer
- Pool the barcoded samples at the desired ratio to a final volume of 65 µl in a DNA LoBind 1.5ml Eppendorf tube. Aim for as high a concentration as possible which does not exceed **200 fmoles** total. If the total volume is >65 µl, perform a 2.5x AMPure clean up and elute in 65 µl of nuclease free water.
- Taking the pooled and barcoded DNA, perform adapter ligation as follows, mixing by flicking the tube between each sequential addition.
  - 65 µl 200 fmol pooled barcoded sample
  - 5 µl Adapter Mix II (AMII adapter from the EXP-NBD104 kit)
  - 20 µl NEBNext Quick Ligation Reaction Buffer (5X)
  - 10 µl Quick T4 DNA Ligase
- Mix gently by flicking the tube, and spin down.
- Incubate the reaction for 10 minutes at RT.

## Ampure XP Beads Cleanup

- Add 50 ul resuspended AMPure XP beads (0.5X) to the reaction and mix by flicking
- Incubate 10 minutes at room temperature
- Thaw Wash Buffer (WSB) and Elution Buffer (EB) at RT, mix by vortexing, spin down and place on ice. Check if the contents of each tube are clear of any precipitate.
- Spin down the tube and place it on the magnet
- Remove the supernatant

- Add 200  $\mu$ l WSB to the beads. Close the tube lid, and resuspend the beads by flicking. Return the tube to the magnetic rack, allow beads to pellet and pipette off the supernatant
- Repeat the previous step.
- Remove the WSB completely by spinning down the tube, pipetting out the liquid and placing back it on magnet
- Air-dry the pellet for maximum 1 minute, do not let it dry out completely!
- Resuspend the beads in 13  $\mu$ l Elution Buffer (EB)
- Incubate 5-10 minutes in RT
- Place the beads on magnet
- Place the elute in a 1.5 ml tube
- Quantify 1  $\mu$ l of eluted sample using a Qubit fluorometer
- The prepared library is used for loading into the MinION flow cell. Store the library on ice until ready to load.
- Move to the “Prepare the library for loading” step.

### **Prepare the library for loading**

#### Before starting:

- Thaw the Sequencing Buffer (SQB), Loading Beads (LB), Flush Tether (FLT) and one tube of Flush Buffer (FB)
- Mix the Sequencing Buffer (SQB) and Flush Buffer (FB) tubes by vortexing, spin down and return to ice.
- Spin down the Flush Tether (FLT) tube, mix by pipetting, and return to ice.
- Mix the contents of LB (Loading beads) with a large volume of pipette to make it homogeneous
- In the new tube, prepare the following:
  - 37.5  $\mu$ l Sequencing Buffer (SQB)
  - 25.5  $\mu$ l Loading Beads (LB), mixed immediately before use
  - 12  $\mu$ l DNA library

### **Priming the flow cell**

#### QC the flowcell:

- Take the flowcell out of the fridge. Connect it to the MinION
- Check Flowcell (QC it to see how many active pores there are)
- Keep it connected until primed.

#### Prime the flowcell:

- Mix the Sequencing Buffer (SQB) and Flush Buffer (FB) tubes by vortexing, spin down and return to ice.
- Spin down the Flush Tether (FLT) tube, mix by pipetting, and return to ice.
- Remove the bubble from the port
- Open the lid of the nanopore sequencing device and slide the flow cell's priming port cover clockwise so that the priming port is visible.
- Set a P1000 pipette to 200  $\mu$ l
- Insert the tip into the priming port

- Turn the wheel until the dial shows 220-230  $\mu$ l, or until you can see a small volume of buffer entering the pipette tip
- Add 30  $\mu$ l FLT into a tube of FB
- Mix by pipetting up and down
- Load 800  $\mu$ l of buffer
- Wait for 5 minutes
- Open sample port cover
- Load 200  $\mu$ l of buffer more into the priming port, observing the bubbles coming out of sample port

Load the library:

- Mix the prepared library gently by pipetting up and down just prior to loading.
- Add 75  $\mu$ l of sample to the flow cell via the SpotON sample port in a dropwise fashion. Ensure each drop flows into the port before adding the next.
- Gently replace the SpotON sample port cover, making sure the bung enters the SpotON port, close the priming port and replace the MinION lid.

## SUPPLEMENTARY TABLES

**Supplementary Table 1. Median tail length of the 7 classes of tail types across species and time points**

| <b>Group</b> | <b>Zebrafish<br/>(2HPF)</b> | <b>Zebrafish<br/>(4HPF)</b> | <b>Zebrafish<br/>(6HPF)</b> | <b>Mouse</b> | <b>Yeast</b> |
|--------------|-----------------------------|-----------------------------|-----------------------------|--------------|--------------|
| AllA         | 40.33                       | 59.82                       | 78.57                       | 93           | 25.29        |
| IntC         | 56.98                       | 74.42                       | 79.03                       | 99.28        | 33           |
| IntG         | 64,615                      | 83.57                       | 78.53                       | 98           | 35.51        |
| IntU         | 55.1                        | 70.02                       | 72,015                      | 90           | 34           |
| TermC        | 51,645                      | 54.28                       | 58.75                       | NA           | NA           |
| TermG        | 49,635                      | 68.1                        | 74.64                       | 82.11        | 28.54        |
| TermU        | 42,855                      | 50,455                      | 31.91                       | 46           | 31.3         |

**Supplementary Table 2. Summary of the Nano3P-seq runs and dRNAseq runs included in this work**

| Species         | RUN ID      | Sample Description          | Method     |
|-----------------|-------------|-----------------------------|------------|
|                 |             |                             |            |
| SYNTHETIC RNAs  | cDNA345234  | Curlcakes                   | Nano3P-seq |
|                 |             |                             |            |
| YEAST           | cDNA231532  | Yeast Total RNA             | Nano3P-seq |
|                 | cDNA365723  | Yeast Total RNA             |            |
|                 | cDNA356382  | Yeast Total RNA             |            |
|                 |             |                             |            |
| MOUSE           | cDNA964321  | Mouse Nuclear/Mitochondrial | Nano3P-seq |
|                 |             |                             |            |
| ZEBRAFISH       | cDNA8523612 | Zebrafish pA selected       | Nano3P-seq |
|                 | PDBN042841  | Zebrafish pA selected       | dRNA-seq   |
|                 | cDNA786327  | Zebrafish Ribodepleted Rep1 | Nano3P-seq |
|                 | cDNA123791  | Zebrafish Ribodepleted Rep2 | Nano3P-seq |
|                 | cDNA897892  | Zebrafish Ribodepleted Rep3 | Nano3P-seq |
|                 |             |                             |            |
| HUMAN           | cDNA867343  | Human pA Selected           | Nano3P-seq |
|                 |             |                             |            |
| SYNTHETIC cDNAs | cDNA925386  | cDNA Standards              | Nano3P-seq |

| Spike-in | RNA Template                                        | Replicate | Device     | Run Time (hr) |
|----------|-----------------------------------------------------|-----------|------------|---------------|
|          |                                                     |           |            |               |
| NA       | Curlicake 1 (non-polyAed) and Curlicake2 (polyA-ed) | 1         | Flongle    | 13            |
|          |                                                     |           |            |               |
| NA       | Yeast Total RNA                                     | 1         | Flongle    | 20            |
| NA       | Yeast Total RNA                                     | 2         | Flongle    | 24            |
| NA       | Yeast Total RNA                                     | 3         | Flongle    | 24            |
|          |                                                     |           |            |               |
| Sequins  | Mouse Nuclear/Mitochondrial RNA (rep1)              | 1         | MinION     | 63            |
|          | Mouse Nuclear/Mitochondrial RNA (rep2)              | 2         |            |               |
|          |                                                     |           |            |               |
| NA       | Zebrafish 4 hpf Embryo oligodT-selected RNA         | 1         | Flongle    | 36            |
| NA       | Zebrafish 4 hpf Embryo oligodT-selected RNA         | 1         | PromethION | 36            |
| Sequins  | Zebrafish 2 hpf Embryo Ribodepleted RNA (rep1)      | 1         | MinION     | 39            |
|          | Zebrafish 4 hpf Embryo Ribodepleted RNA (rep1)      |           |            |               |
| Sequins  | Zebrafish 6 hpf Embryo Ribodepleted RNA (rep1)      |           |            |               |
|          | Zebrafish 2 hpf Embryo Ribodepleted RNA (rep2)      | 2         | MinION     | 39            |
|          | Zebrafish 4 hpf Embryo Ribodepleted RNA (rep2)      |           |            |               |
|          | Zebrafish 6 hpf Embryo Ribodepleted RNA (rep2)      |           |            |               |
| NA       | Zebrafish 2 hpf Embryo Ribodepleted RNA (rep3)      | 3         | MinION     | 72            |
| NA       | Zebrafish 4 hpf Embryo Ribodepleted RNA (rep3)      |           |            |               |
| NA       | Zebrafish 6 hpf Embryo Ribodepleted RNA (rep3)      |           |            |               |
|          |                                                     |           |            |               |
| NA       | HeLa mRNA                                           | 1         | MinION     | 72            |
| NA       | HeLa mRNA                                           | 2         |            |               |
|          |                                                     |           |            |               |
| NA       | 0 pA standard                                       | 1         | MinION     | 22            |
| NA       | 15 pA standard                                      | 1         |            |               |
| NA       | 30 pA standard                                      | 1         |            |               |
| NA       | 60 pA standard                                      | 1         |            |               |
| NA       | 90 pA standard                                      | 1         |            |               |
| NA       | 120 pA standard                                     | 1         |            |               |
| NA       | 1U + 29 pA standard                                 | 1         |            |               |
| NA       | 3U + 27 pA standard                                 | 1         |            |               |
| NA       | 5U + 25 pA standard                                 | 1         |            |               |
| NA       | 5G + 25 pA standard                                 | 1         |            |               |
| NA       | 5C + 25 pA standard                                 | 1         |            |               |
| NA       | IntG standard                                       | 1         |            |               |

| Bar code | Sequenced reads | Basecalled reads (Guppy 6.0.1) | Demultiplexed reads | Mapped reads (Genome + rRNA) | Mapped reads (Curlicakes/ cDNA standards) | ENA Primary Accession | ENA Sample Accession |
|----------|-----------------|--------------------------------|---------------------|------------------------------|-------------------------------------------|-----------------------|----------------------|
| NA       | 60,078          | 60,078                         | NA                  | NA                           | 47,950                                    | PRJEB53494            | ERS12199230          |
| NA       | 257,307         | 257,307                        | NA                  | 238,726                      | NA                                        | PRJEB53494            | ERS12199231          |
| NA       | 269,184         | 269,184                        | NA                  | 191,992                      | NA                                        | PRJEB53494            | ERS12199232          |
| NA       | 123,712         | 123,712                        | NA                  | 83,070                       | NA                                        | PRJEB53494            | ERS12199233          |
| 1        | 770,213         | 770,213                        | 358,351             | 289,222                      | NA                                        | PRJEB53494            | ERS12199234          |
| 2        |                 |                                | 324,387             | 151,186                      | NA                                        | PRJEB53494            | ERS12199234          |
| NA       | 233,101         | 233,101                        | NA                  | 207,235                      | NA                                        | PRJEB53494            | ERS12199235          |
| NA       | 897,768         | 897,768                        | NA                  | 363,468                      | NA                                        | PRJEB53494            | ERS12521224          |
| 1        | 1,644,127       | 1,644,127                      | 340,730             | 297,460                      | NA                                        | PRJEB53494            | ERS12199236          |
| 2        |                 |                                | 594,200             | 480,569                      | NA                                        | PRJEB53494            | ERS12199236          |
| 3        |                 |                                | 323,806             | 302,334                      | NA                                        | PRJEB53494            | ERS12199236          |
| 1        | 1,955,353       | 1,955,353                      | 628,646             | 486,072                      | NA                                        | PRJEB53494            | ERS12199237          |
| 2        |                 |                                | 540,195             | 363,032                      | NA                                        | PRJEB53494            | ERS12199237          |
| 3        |                 |                                | 551,172             | 333,348                      | NA                                        | PRJEB53494            | ERS12199237          |
| 1        | 587,456         | 587,456                        | 130,728             | 109,482                      | NA                                        | PRJEB53494            | ERS12199238          |
| 2        |                 |                                | 181,783             | 154,695                      | NA                                        | PRJEB53494            | ERS12199238          |
|          |                 |                                | 189,621             | 169,293                      | NA                                        | PRJEB53494            | ERS12199238          |
| 1        | 254,740         | 254,740                        | 121,383             | 110,186                      | NA                                        | PRJEB53494            | ERS12496709          |
| 2        |                 |                                | 99,102              | 88,236                       | NA                                        | PRJEB53494            | ERS12496709          |
| 1        | 599,568         | 599,568                        | 38,271              | NA                           | 4,761                                     | PRJEB53494            | ERS12199239          |
| 2        |                 |                                | 52,580              | NA                           | 8,002                                     | PRJEB53494            | ERS12199239          |
| 3        |                 |                                | 54,732              | NA                           | 2,100                                     | PRJEB53494            | ERS12199239          |
| 4        |                 |                                | 18,911              | NA                           | 567                                       | PRJEB53494            | ERS12199239          |
| 5        |                 |                                | 15,397              | NA                           | 658                                       | PRJEB53494            | ERS12199239          |
| 6        |                 |                                | 4,041               | NA                           | 57                                        | PRJEB53494            | ERS12199239          |
| 7        |                 |                                | 57,810              | NA                           | 10,266                                    | PRJEB53494            | ERS12199239          |
| 8        |                 |                                | 65,674              | NA                           | 11,503                                    | PRJEB53494            | ERS12199239          |
| 9        |                 |                                | 36,937              | NA                           | 5,879                                     | PRJEB53494            | ERS12199239          |
| 10       |                 |                                | 53,576              | NA                           | 9,213                                     | PRJEB53494            | ERS12199239          |
| 11       |                 |                                | 55,884              | NA                           | 12,584                                    | PRJEB53494            | ERS12199239          |
| 12       |                 |                                | 58,789              | NA                           | 8,999                                     | PRJEB53494            | ERS12199239          |



**Supplementary Table 3 Correlation values between per-gene polyA tail length estimations between different methods and Nano3P-seq**

Pearson

**Human (HeLa)**

|            | FLAM-seq | PAL-seq | TAIL-seq | Nano3P-seq |
|------------|----------|---------|----------|------------|
| FLAM-seq   | -        |         | 0.31     | 0.10       |
| PAL-seq    |          | 0.31    | -        | 0.19       |
| TAIL-seq   |          | 0.10    | 0.19     | -          |
| Nano3P-seq |          | 0.47    | 0.47     | 0.19       |

**Yeast**

| Methods    | PAT-seq | PAL-seq | Nano3P-seq |
|------------|---------|---------|------------|
| PAT-seq    | -       |         | 0.42       |
| PAL-seq    |         | 0.42    | -          |
| Nano3P-seq |         | 0.43    | 0.43       |

**Zebrafish**

| Timepoints | Nano3P-seq vs PAL-seq |
|------------|-----------------------|
| 2 hpf      | 0.82                  |
| 4 hpf      | 0.85                  |
| 6 hpf      | 0.71                  |

## Spearman

### Human (HeLa)

|            | FLAM-seq | PAL-seq | TAIL-seq | Nano3P-seq |      |      |
|------------|----------|---------|----------|------------|------|------|
| FLAM-seq   | -        |         | 0.31     | 0.10       | 0.43 |      |
| PAL-seq    |          | 0.31    | -        | 0.18       | 0.44 |      |
| TAIL-seq   |          | 0.10    |          | 0.18       | -    | 0.17 |
| Nano3P-seq |          | 0.43    |          | 0.44       | 0.17 | -    |

### Yeast

| Methods    | PAT-seq | PAL-seq | Nano3P-seq |      |
|------------|---------|---------|------------|------|
| PAT-seq    | -       |         | 0.43       | 0.44 |
| PAL-seq    |         | 0.43    | -          | 0.44 |
| Nano3P-seq |         | 0.44    | 0.44       | -    |

### Zebrafish

| Timepoints | Nano3P-seq vs PAL-seq |
|------------|-----------------------|
| 2 hpf      | 0.82                  |
| 4 hpf      | 0.69                  |
| 6 hpf      | 0.86                  |

## SUPPLEMENTARY NOTES

### Supplementary Note S1.

Tail composition analyses in cDNA standards (**Figure 5c** and **Extended Data Figure 5a**) revealed slight inaccuracies in the predictions, mainly in cDNA standards containing 5U, 5C or 5G at their 3'ends. We believe that this phenomenon is caused by the homopolymeric nature of these sequences. Indeed, previous reports have shown that increased base-calling errors (in the form of insertions and/or deletions) in nanopore sequencing datasets frequently occur at homopolymeric positions consisting of 5 or more identical consecutive bases (Delahaye and Nicolas 2021; Huang, Liu, and Shih 2021). These inaccuracies are unlikely to be seen in biological systems, since Nano3P-seq (and previous literature (Legnini et al. 2019; Chang et al. 2014)) in *in vivo* datasets shows that the majority of homopolymeric non-A terminal ends are shorter than 5 bases.

### Supplementary Note S2.

Although the chromatogram in Extended Data Figure 2j only shows 4 A nucleosides based on the "consensus prediction", there are additional A bases that can also be seen in subsequent positions, which have smaller peaks than the G peaks, with decreasing frequency. This phenomenon is the result of sequencing a heterogeneous population of polyA tail lengths, where G/I tails are incorporated into RNA populations with slight differences in their polyA tail lengths.

### Supplementary Note References

- Chang, Hyeshik, Jaechul Lim, Minju Ha, and V. Narry Kim. 2014. "TAIL-Seq: Genome-Wide Determination of poly(A) Tail Length and 3' End Modifications." *Molecular Cell* 53 (6): 1044–52.
- Delahaye, Clara, and Jacques Nicolas. 2021. "Sequencing DNA with Nanopores: Troubles and Biases." *PloS One* 16 (10): e0257521.
- Harrison, Paul F., David R. Powell, Jennifer L. Clancy, Thomas Preiss, Peter R. Boag, Ana Traven, Torsten Seemann, and Traude H. Beilharz. 2015. "PAT-Seq: A Method to Study the Integration of 3'-UTR Dynamics with Gene Expression in the Eukaryotic Transcriptome." *RNA* 21 (8): 1502–10.
- Huang, Yao-Ting, Po-Yu Liu, and Pei-Wen Shih. 2021. "Homopolish: A Method for the Removal of Systematic Errors in Nanopore Sequencing by Homologous Polishing." *Genome Biology* 22 (1): 95.
- Legnini, Ivano, Jonathan Alles, Nikos Karaikos, Salah Ayoub, and Nikolaus Rajewsky. 2019. "FLAM-Seq: Full-Length mRNA Sequencing Reveals Principles of poly(A) Tail Length Control." *Nature Methods* 16 (9): 879–86.
- Lim, Jaechul, Minju Ha, Hyeshik Chang, S. Chul Kwon, Dharendra K. Simanshu, Dinshaw J. Patel, and V. Narry Kim. 2014. "Uridylation by TUT4 and TUT7 Marks mRNA for Degradation." *Cell* 159 (6): 1365–76.
- Subtelny, Alexander O., Stephen W. Eichhorn, Grace R. Chen, Hazel Sive, and David P. Bartel. 2014. "Poly(A)-Tail Profiling Reveals an Embryonic Switch in Translational Control." *Nature* 508 (7494): 66–71.
